# Supplementary material for: Comparative Study of Metal Substrates for Improved Carbonization of Electrospun PAN Nanofibers
Source: MDPI journal article supplement (doi:10.3390/polym14040721), 2022-02-13
Supplement: s1 [file s1]

## Comparative Study of Metal Substrates for Improved Carbonization of Electrospun PAN Nanofibers

Jan Lukas Storck <sup>1</sup>, Martin Wortmann <sup>2</sup>, Bennet Brockhagen <sup>1</sup>, Natalie Frese <sup>2</sup>, Elise Diestelhorst <sup>1</sup>, Timo Grothe <sup>1</sup> Christian Hellert <sup>1</sup> and Andrea Ehrmann <sup>1,\*</sup>

<sup>1</sup> Faculty of Engineering and Mathematics, Bielefeld University of Applied Sciences, 33619 Bielefeld, Germany; jan\_lukas.storck@fh-bielefeld.de (J.L.S.); bennet.brockhagen@fh-bielefeld.de (B.B.); elise.diestelhorst@fh-bielefeld.de (E.D.); timo.grothe@fh-bielefeld.de (T.G.); christian.hellert@fh-bielefeld.de (C.H.)

<sup>2</sup> Faculty of Physics, Bielefeld University, 33615 Bielefeld, Germany; martin.wortmann@fh-bielefeld.de (M.W.); nfrese@uni-bielefeld.de (N.F.)

\* Correspondence: andrea.ehrmann@fh-bielefeld.de

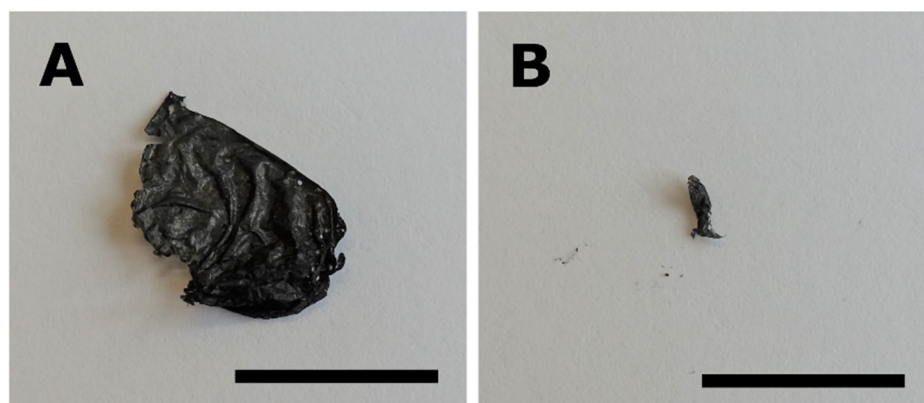

**Figure S1.** Photographic images of specimens after carbonization in Ti sandwiches at 1200 °C for 1 h with different original thicknesses: (A)  $3.5\ \mu\text{m} \pm 0.8\ \mu\text{m}$  and (B)  $1.1\ \mu\text{m} \pm 0.4\ \mu\text{m}$ . Scale bars depict 10 mm.
